# Supplementary material for: TriMaster: randomised double-blind crossover study of a DPP4 inhibitor, SGLT2 inhibitor and thiazolidinedione as second-line or third-line therapy in patients with type 2 diabetes who have suboptimal glycaemic control on metformin treatment with or without a sulfonylurea—a MASTERMIND study protocol
Source: HighWire-hosted journal article supplement (doi:10.1136/bmjopen-2020-042784), 2020-12-01
Supplement: bmjopen-2020-042784supp003_data_supplement.pdf [file bmjopen-2020-042784supp003_data_supplement.pdf]

| Data Category                                 | Information                                                                                                                                                                                                                                                                                                                                                                                                                                                                            |
|-----------------------------------------------|----------------------------------------------------------------------------------------------------------------------------------------------------------------------------------------------------------------------------------------------------------------------------------------------------------------------------------------------------------------------------------------------------------------------------------------------------------------------------------------|
| Primary registry and trial identifying number | ClinicalTrials.gov NCT02653209                                                                                                                                                                                                                                                                                                                                                                                                                                                         |
| Date of registration in primary registry      | 8 January 2016                                                                                                                                                                                                                                                                                                                                                                                                                                                                         |
| Secondary identifying numbers                 | EudraCT 2015-002790-38; ISRCTN12039221; Sponsor 1603221; Funder MR/N00633X/1; HRA 16/SC/0147; IRAS 183044                                                                                                                                                                                                                                                                                                                                                                              |
| Source(s) of monetary or material support     | Medical Research Council, UK                                                                                                                                                                                                                                                                                                                                                                                                                                                           |
| Primary sponsor                               | Royal Devon and Exeter NHS Foundation Trust                                                                                                                                                                                                                                                                                                                                                                                                                                            |
| Sponsor contact details                       | Alison Kerridge, Assistant R&D Manager;<br>Research and Development,<br>First Floor, Bowmoor House<br>Barrack Road,<br>Exeter<br>EX2 5DW<br><a href="mailto:alison.kerridge@nhs.net">alison.kerridge@nhs.net</a> ; 01392 403055                                                                                                                                                                                                                                                        |
| Contact for public queries                    | Catherine Angwin, Trial Manager;<br>NIHR Exeter Clinical Research Facility<br>Room 02.15, RILD Building<br>Barrack Road<br>Exeter<br>EX2 5DW<br><a href="mailto:Rde-tr.DiabetesDrugResponse@nhs.net">Rde-tr.DiabetesDrugResponse@nhs.net</a> ; 01392 408180                                                                                                                                                                                                                            |
| Contact for scientific queries                | Professor Andrew Hattersley FRCP FMedSci<br>FRS, Chief Investigator;<br>University of Exeter Medical School<br>RILD Building<br>Barrack Road<br>Exeter<br>EX2 5DW<br><a href="mailto:A.T.Hattersley@exeter.ac.uk">A.T.Hattersley@exeter.ac.uk</a> ; 01392 408260                                                                                                                                                                                                                       |
| Public title                                  | TriMaster: Study of a DPP4 inhibitor, SGLT2 Inhibitor and Thiazolidinedione as Third Line Therapy in patients with Type 2 Diabetes.                                                                                                                                                                                                                                                                                                                                                    |
| Scientific title                              | TriMaster: Randomised Double-Blind Crossover Study of a DPP4 Inhibitor, SGLT2 Inhibitor and Thiazolidinedione as Third Line Therapy in Patients With Type 2 Diabetes Who Have Suboptimal Glycaemic Control on Dual Therapy with Metformin and a Sulphonylurea                                                                                                                                                                                                                          |
| Countries of recruitment                      | United Kingdom                                                                                                                                                                                                                                                                                                                                                                                                                                                                         |
| Health condition(s) or problem(s) studied     | Type 2 Diabetes                                                                                                                                                                                                                                                                                                                                                                                                                                                                        |
| Intervention(s)                               | Drug: Sitagliptin (2x50mg as over-encapsulated hard shell to be taken orally, once a day); Drug: Canagliflozin (100mg as over-encapsulated hard shell to be taken orally, once a day); Drug: Pioglitazone (30mg as over-encapsulated hard shell to be taken orally, once a day)<br><br>All participants receive all 3 interventional treatments for 16 weeks each in random order according to one of 6 possible treatment order (ABC, ACA, BAC, BCA, CAB, CBA) with no washout period |
| Key inclusion and exclusion criteria          | Ages eligible for study: 30 – 80 years (inclusive); Sexes eligible for study: both; Accepts healthy volunteers: no                                                                                                                                                                                                                                                                                                                                                                     |

|                         |                                                                                                                                                                                                                                                                                                                                                                                                                                                                                                                                                                                                                                                                                                                                                                                                                                                                                                                                                                                                                                                                                                                                                                                                                                                                                                                                                                                                                                                                                                                                                                                                                                                                                                                                                                                                                                                                                                                                                                                                                                                                                                                                                                                                                                                                        |
|-------------------------|------------------------------------------------------------------------------------------------------------------------------------------------------------------------------------------------------------------------------------------------------------------------------------------------------------------------------------------------------------------------------------------------------------------------------------------------------------------------------------------------------------------------------------------------------------------------------------------------------------------------------------------------------------------------------------------------------------------------------------------------------------------------------------------------------------------------------------------------------------------------------------------------------------------------------------------------------------------------------------------------------------------------------------------------------------------------------------------------------------------------------------------------------------------------------------------------------------------------------------------------------------------------------------------------------------------------------------------------------------------------------------------------------------------------------------------------------------------------------------------------------------------------------------------------------------------------------------------------------------------------------------------------------------------------------------------------------------------------------------------------------------------------------------------------------------------------------------------------------------------------------------------------------------------------------------------------------------------------------------------------------------------------------------------------------------------------------------------------------------------------------------------------------------------------------------------------------------------------------------------------------------------------|
|                         | <p>Inclusion Criteria: Clinical diagnosis of Type 2 diabetes, Age <math>\geq 30</math> and <math>\leq 80</math>, currently treated with two classes of oral glucose-lowering therapy that do not include a DPP4-inhibitor, a SGLT2 inhibitor or a thiazolidinedione, diabetes duration <math>\geq 12</math> months, no change in diabetes treatment (new treatments or dose change) within previous 3 months, HbA1c <math>&gt; 58\text{mmol/mol}</math> (7.5%) and <math>\leq 110\text{mmol/mol}</math> (12.2%) – confirmed at screening visit, eGFR <math>\geq 60\text{mls/min/1.73m}^2</math> – confirmed at screening visit, able and willing to give informed consent</p> <p>Exclusion Criteria: Changes in glucose-lowering therapy or dose within last 3 months, HbA1c <math>\leq 58\text{mmol/mol}</math> (7.5%) or <math>&gt; 110\text{mmol/mol}</math> (12.2%), eGFR <math>&lt; 60\text{mls/min/1.73m}^2</math>, diabetes duration <math>&lt; 12</math> months, ALT <math>&gt; 2.5</math> x upper limit of the assay normal range or known liver disease, specifically <math>&gt; 30\mu\text{mol/L}</math> that is associated with other evidence of liver failure, insulin treated within the last 12 months, limb ischaemia shown by absence of both pulses in one or both feet, currently treated with corticosteroids, currently treated with rifampicin, gemfibrozil, phenytoin and carbamazepine, active infection (requiring antibiotics at present), foot ulcer requiring antibiotics within previous three months, recent (within 3 months) significant surgery or planned surgery (excluding minor procedures), acute cardiovascular episode (angina, myocardial infarction, stroke, transient ischemic episode) occurring within the previous 3 months, history of heart failure, current use of loop diuretic therapy (Furosemide or Bumetanide), history of bladder carcinoma, current/ongoing investigation for macroscopic haematuria, history of diabetic ketoacidosis, history of pancreatitis, pregnant, breastfeeding or planning a pregnancy over the study period, concurrent participation on another CTIMP (where IMP is currently being taken or without sufficient washout period), unable or unwilling to give informed consent</p> |
| Study type              | <p>Interventional</p> <p>Allocation: Randomised; Intervention model: Crossover assignment; Masking: Double (Participant, Investigator)</p> <p>Primary Purpose: Treatment</p> <p>Phase 4</p>                                                                                                                                                                                                                                                                                                                                                                                                                                                                                                                                                                                                                                                                                                                                                                                                                                                                                                                                                                                                                                                                                                                                                                                                                                                                                                                                                                                                                                                                                                                                                                                                                                                                                                                                                                                                                                                                                                                                                                                                                                                                            |
| Date of first enrolment | 1 November 2016                                                                                                                                                                                                                                                                                                                                                                                                                                                                                                                                                                                                                                                                                                                                                                                                                                                                                                                                                                                                                                                                                                                                                                                                                                                                                                                                                                                                                                                                                                                                                                                                                                                                                                                                                                                                                                                                                                                                                                                                                                                                                                                                                                                                                                                        |
| Target sample size      | 525 (reduced from 600)                                                                                                                                                                                                                                                                                                                                                                                                                                                                                                                                                                                                                                                                                                                                                                                                                                                                                                                                                                                                                                                                                                                                                                                                                                                                                                                                                                                                                                                                                                                                                                                                                                                                                                                                                                                                                                                                                                                                                                                                                                                                                                                                                                                                                                                 |
| Recruitment status      | Active, not recruiting                                                                                                                                                                                                                                                                                                                                                                                                                                                                                                                                                                                                                                                                                                                                                                                                                                                                                                                                                                                                                                                                                                                                                                                                                                                                                                                                                                                                                                                                                                                                                                                                                                                                                                                                                                                                                                                                                                                                                                                                                                                                                                                                                                                                                                                 |
| Primary outcome(s)      | On treatment HbA1c in obese patients ( $\text{BMI} > 30\text{kgm}^{-2}$ ) compared to non-obese patients ( $\text{BMI} < 30\text{kgm}^{-2}$ ), (time frame: 16 weeks); On treatment HbA1c in patients with                                                                                                                                                                                                                                                                                                                                                                                                                                                                                                                                                                                                                                                                                                                                                                                                                                                                                                                                                                                                                                                                                                                                                                                                                                                                                                                                                                                                                                                                                                                                                                                                                                                                                                                                                                                                                                                                                                                                                                                                                                                             |

|                        |                                                                                                                                                                                                                                             |
|------------------------|---------------------------------------------------------------------------------------------------------------------------------------------------------------------------------------------------------------------------------------------|
|                        | an eGFR<90mls/min/1.73m <sup>2</sup> compared to patients with an eGFR>90mls/min/1.73m <sup>2</sup> , (time frame: 16 weeks)                                                                                                                |
| Key secondary outcomes | Patient preference [Time frame: 48-54 weeks (3x16 weeks of therapy)]; Prevalence of side effects [Time frame: 48-54 weeks (3x16 weeks of therapy)]; HbA1c on therapy against predefined test of gender heterogeneity (Time frame: 16 weeks) |
| Ethics Review          | Status: Approved                                                                                                                                                                                                                            |
|                        | Date of Approval: 9 May 2016                                                                                                                                                                                                                |
|                        | South Central – Oxford A Research Ethics Committee<br><a href="mailto:Nrescommittee.southcentral-oxforda@nhs.net">Nrescommittee.southcentral-oxforda@nhs.net</a>                                                                            |
| Completion Date        | January 2021                                                                                                                                                                                                                                |
| Summary Results        | N/A as study has not completed yet                                                                                                                                                                                                          |
